# Supplementary material for: Effectiveness and cost-effectiveness of a cardiovascular risk prediction algorithm for people with severe mental illness (PRIMROSE)
Source: PubMed Central journal article supplement (PMC5588956; doi:10.1136/bmjopen-2017-018181), 2017-09-05

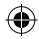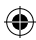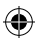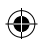

Supplement: bmjopen-2017-018181.draft_revisions.pdf [file bmjopen-2017-018181.draft_revisions.pdf]
